# Supplementary material
Source: publisher figshare collection journal article supplement (https://frontiersin.figshare.com/ndownloader/files/17514062)
Supplement: Supplementary file [file 17514062]

## Supplementary data 1

Overview of the transcript profiles of the potential *npp* genes in *S. japonicum*.

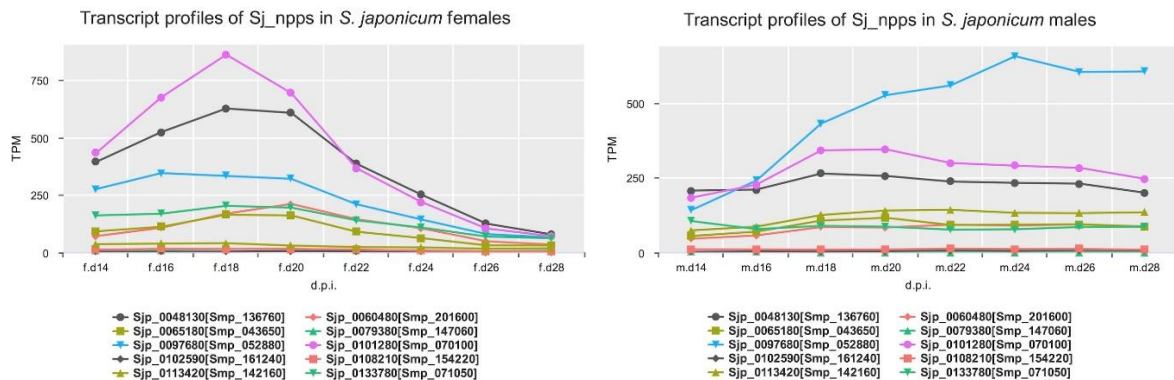

Ten *npps* of *S. japonicum* (*Sjp\_...*; each color is representative for one *Sjp\_npp*) were identified by using all *npp* genes of *S. mansoni* [Smp\_...] as templates for a search of potential orthologs in *S. japonicum* using the BioMart module from WormBase ParaSite (<https://parasite.wormbase.org/>). Based on the transcriptomic data provided by Wang et al. (2017), the transcript levels of these *Sjp\_npps* were determined ([https://parasite.wormbase.org/expression/schistosoma\\_japonicum\\_prjea34885/index.html#SRP090154](https://parasite.wormbase.org/expression/schistosoma_japonicum_prjea34885/index.html#SRP090154)). On the left side, transcript profiles of the 10 *Sjp\_npps* in females are presented, on the right side those of males. A reduction of *Sj\_npp* transcript levels was observed in females after pairing from d18 on. In contrast, the transcript levels of these *Sj\_npps* remained at a constant level in males or, in one case (*Sjp\_0097680*, potential ortholog of Smp\_052880), increased from d18 on.

Wang, J., Yu, Y., Shen, H., Qing, T., Zheng, Y., Li, Q., et al. (2017) Dynamic transcriptomes identify biogenic amines and insect-like hormonal regulation for mediating reproduction in *Schistosoma japonicum*. *Nat. Commun.* 8:14693. doi: 10.1038/ncomms14693.
